# Supplementary material for: Sheath-enhanced concentration and on-chip detection of bacteria from an extremely low-concentration level
Source: Royal Society of Chemistry journal article supplement (doi:10.1039/d4lc00698d), 2024-12-03
Supplement: d4lc00698d1.pdf [file d4lc00698d1.pdf]

## **Sheath-Enhanced Concentration and On-chip Detection of Bacteria from Extremely Low-concentration Level**

Xinye Chen<sup>a</sup>, Ruonan Peng<sup>a</sup>, Ruo-Qian Wang<sup>b</sup>, and Ke Du<sup>\*a</sup>

<sup>a</sup> Department of Chemical and Environmental Engineering, University of California, Riverside,  
Riverside, CA 92507 USA. Email: [kdu@ucr.edu](mailto:kdu@ucr.edu)

<sup>b</sup> Department of Civil and Environmental Engineering, Rutgers, The State University of New Jersey,  
New Brunswick, NJ 08854 USA

(a)

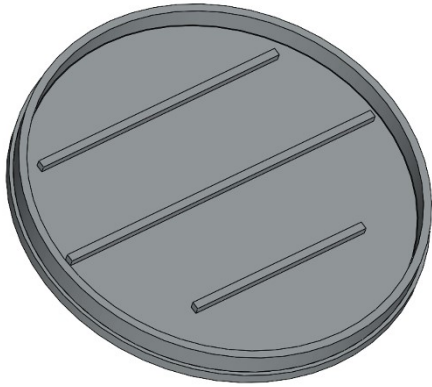

(b)

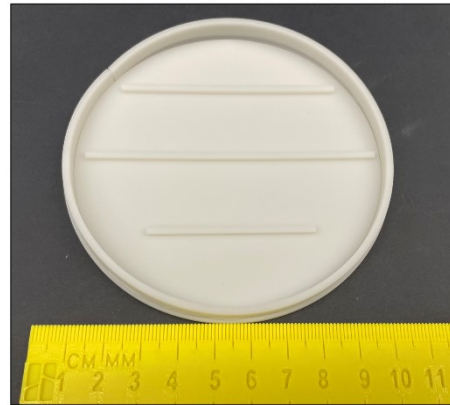

**Fig. S1** (a) The design of pneumatic chamber mold by Solidworks. The chamber height and width are 2 mm and 2mm, respectively; (b) 3-D printed mold for creating PDMS replica.

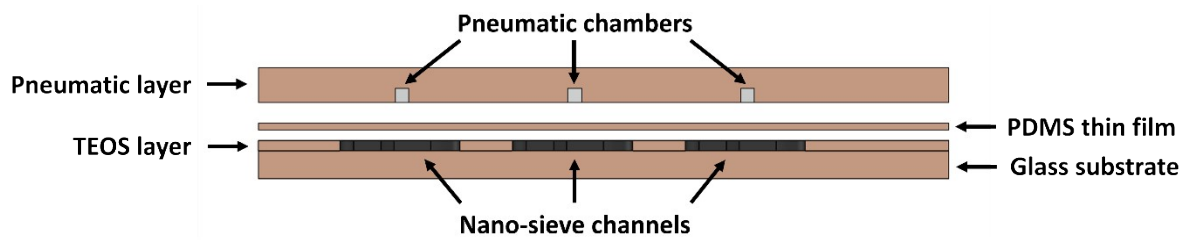

**Fig. S2** The cross-sectional view of the nano-sieve device proposed in our study. Three major components includes: 1) Pneumatic layer (Top); 2) PDMS thin film (Middle); 3) Glass substrate with nano-sieve channels in TEOS layer (Bottom).
